# Supplementary material for: Effect of Sonication Treatment and Maceration Time in the Extraction of Polysaccharide Compounds during Red Wine Vinification
Source: MDPI journal article supplement (doi:10.3390/molecules26154452), 2021-07-23
Supplement: s1 [file s1]

Table S1. Standard enological parameters of must, must-wines at the end of maceration and wine samples<sup>a</sup>

| Parameter <sup>b</sup> | Must <sup>c</sup> |         | Must-wine <sup>c</sup> |          |         |          |         | Wine <sup>c</sup> |          |          |          |         |
|------------------------|-------------------|---------|------------------------|----------|---------|----------|---------|-------------------|----------|----------|----------|---------|
|                        | C-M               | S28-M   | CMF-2d                 | S28MF-2d | CMF-3d  | S28MF-3d | CMF-7d  | CW-2d             | S28W-2d  | CW-3d    | S28W-3d  | CW-7d   |
| Density                | 1.120 a           | 1.120 a | 1.110 c                | 1.108 c  | 1.084 b | 1.079 b  | 1.008 a | 0.992 a           | 0.993 a  | 0.992 a  | 0.992 a  | 0.993 a |
| Alcohol                |                   |         |                        |          |         |          |         | 15.72 b           | 15.67 ab | 15.52 ab | 15.70 ab | 14.92 a |
| TPI                    | 18.29 a           | 32.07 b | 35.25 a                | 46.06 b  | 44.73 b | 68.25 c  | 67.85 c | 32.93 a           | 42.60 b  | 44.01 b  | 54.63 c  | 63.83 d |

<sup>a</sup>Average of the three measurements. Different letters in the same line indicates statistically differences ( $p < 0.05$ ). Lower-case letters compare separately musts, must-wines and wines.

<sup>b</sup> Density: g/L; Alcohol: % ethanol by volume at 20°C; TA: titratable acidity as g of tartaric acid equivalents/L; VA: volatile acidity as g acetic acid/L; TPI: total phenol index; CI.: color intensity as sum of absorbances at 420, 520 and 620 nm.

<sup>c</sup>C-M, control must; S28-M, must with sonicated grapes at 28 kHz; CMF-2d, control must-wine with two days maceration; S28MF-2d, 28 kHz-treated must-wine with two days maceration; CMF-3d, control must-wine with three days maceration; S28MF-3d, 28 kHz-treated must-wine with three days maceration; CMF-7d, control must-wine with seven days maceration; CW-2d, control wine with two days maceration; S28W-2d, 28 kHz-treated wine with two days maceration; CW-3d, control wine with three days maceration; S28W-3d, 28 kHz-treated wine with three days maceration; CW-7d, control wine with seven days maceration.
